# Supplementary material for: Crustacean amphipods from marsh ponds: a nutritious feed resource with potential for application in Integrated Multi-Trophic Aquaculture
Source: PeerJ. 2018 Jan 12;6:e4194. doi: 10.7717/peerj.4194 (PMC5768175; doi:10.7717/peerj.4194)
Supplement: Supplemental Information 1 [file peerj-06-4194-s001.xlsx]

## Sheet: Raw data
	Raw data of lipid classes, fatty acids, amino acids and metals are in the tables of the manuscript.
	Raw data of general chemical composition
	Species	Stations	Ashes	Proteins	Carbohydrates	Total lipids
	G. insensibilis	1	45.3277	39.006	4.10694	11.5593
		6	42.5116	39.5753	3.50575	14.4074
	M. palmata	2	34.8059	37.8182	9.71144	17.6644
		5	49.3378	31.934	4.59931	14.1289
	C. filosa	2	45.9728	33.6751	5.74539	14.6067
		4	46.187	35.009	6.57145	12.2326
	M. gryllotalpa	3	40.5877	33.7013	6.90103	18.8099
		4	42.1727	31.9693	6.37568	19.4823
	M. acherisicum	1	44.6192	32.0541	4.81063	18.516
		5	47.0659	30.8508	3.89669	18.1866
